# Supplementary material for: Modeling Lung Cancer Evolution and Preclinical Response by Orthotopic Mouse Allografts
Source: Oxford University Press journal article supplement (doi:10.1158/0008-5472.can-14-1606), 2014-09-13
Supplement: 00085472can141606-sup-132441_1_supp_0_nbfq5f.docx [file 00085472can141606-sup-132441_1_supp_0_nbfq5f.docx]

**Supplementary Figure Legend**

**Figure S1. Common histological subtypes of NSCLC orthoallografts**.

Passage #1 orthoallografts derived from *K-Ras*lox/LSLG12V; RERTert/ert primary tumors after implantation into recipient nude mice. Engrafted tumors reproduce the major histological subtypes of human invasive lung adenocarcinoma. **A)** H&E staining of a representative engrafted tumor that shows invasion of the host lung. **B)** Acinar adenocarcinoma consists of round to oval-shaped malignant glands invading a fibrous stroma. **C)** Papillary adenocarcinoma with contribution of solid adenocarcinoma. **D)** Pure papillary adenocarcinoma. **E)** Adenocarcinoma with areas of acinar and micropapillary subtypes. **F**) Adenocarcinoma with signet ring cell features. **G)** Solid adenocarcinoma with mucin component. **H)** Diastase-periodic acid Schiff (DPAS) staining to highlight the intracytoplasmatic mucin droplets in solid adenocarcinoma. **I)** Poorly differentiated adenocarcinoma with spindle cell features and sarcomatoid appearance. **J)** Cytokeratin 7 immunohistochemical staining in predominant solid adenocarcinoma with acinar component. **K)** Thyroid transcription factor-1 (TTF-1) immunohistochemical staining in papillary adenocarcinoma. **L)** TTF1 immunohistochemical staining in solid adenocarcinoma. Scale bars 100 μm except panel A (1 mm) and G, H, I (50 μm).

**Figure S2. *In vitro* characterization of primary cell lines derived from NSCLC**

**orthoallografts.**

**A)** Detection of K-RasG12V expression (based on its surrogate marker ß-Geo) by X-Gal staining in the indicated primary mKLC cell lines. Scale bar: 40 microns. **B)** qRT-PCR of the cytokeratins 13 and 19, N- and E-cadherin and vimentin in the indicated mKLC cell lines. Samples from murine normal lung, *K-Ras*lox/LSLG12Vgeo NSCLC primary tumors and mouse embryonic fibroblasts (MEFs) were assessed in parallel for comparative purposes. **C)** Western blot analysis of p53 and p21 in lysates prepared from the indicated mKLC cell lines in the presence or absence of doxorubicin. GAPDH is shown as a loading control. * indicates p-value < 0.01.

**Figure S3. Lung colonization and tumor formation upon reintroduction of mKLC cell lines.**

A cohort of recipient nude mice (n=3 per time point) was inoculated with 106 mKLC cells (3 independent cell lines) via tail vein injection. Lung tissue was collected at 4, 8, 12, and 25 days post-injection and tissue sections stained with H&E **A)** X-Gal staining of lung sections after 4 days to facilitate detection of mKLC cells. **B)** Small clusters of tumor cells (marked by a red dashed line) were observed after 4 days. **C)** Presence of clusters of scattered atypical cells identified after 8 days. **D)** Small nodules of tumor cells with focal acinar differentiation observed at 12 days post-injection. **E)** Confluent tumor nodules including both acinar and solid components observed at humane end point (25 days after injection). Images of increasing magnification are shown from left to right, scale bars: left column 2 mm (except upper panel 400 μm), middle column 200 μm, right column 100 μm.

**Figure S4. Inoculation of mKLC single cell clones gives rise to NSCLC heterogeneity *in vivo.***

Representative H&E staining of lung tumors developed following tail vein injection of three independent cell lines **(A-C)** derived upon single cell cloning of mKLC.7A-DI. The presence of mixed solid (S) and acinar (A) histopathological component is indicated in the right panels. Scale bars 400 μm (left panels), 200 μm (right panels).
